# Supplementary material
Source: PubMed Central journal article supplement (PMC5544516)
Supplement: CJN.10881016SupplementaryData.pdf [file CJN.10881016SupplementaryData.pdf]

Christiane Drechsler MD PhD <sup>1,2</sup>, Salim S. Hayek MD <sup>3</sup>, Changli Wei MD PhD <sup>4</sup>, Sanja Sever PhD <sup>5</sup>, Bernd Genser MSc, PhD <sup>6,7</sup>, Vera Krane MD <sup>1,2</sup>, Andreas Meinitzer PhD <sup>8</sup>, Winfried März MD <sup>8,9,10</sup>, Christoph Wanner MD <sup>1,2</sup>, Jochen Reiser MD PhD<sup>4</sup>

<sup>1</sup> Department of Medicine, Division of Nephrology, University of Würzburg, Würzburg, Germany

<sup>2</sup> Comprehensive Heart Failure Center, Würzburg, Germany

<sup>3</sup> Emory University School of Medicine, Department of Medicine, Division of Cardiology, Atlanta, USA

<sup>4</sup> Department of Medicine, Rush University Medical Center, Chicago, Illinois, USA

<sup>5</sup> Division of Nephrology, Massachusetts General Hospital, Harvard Medical School, Boston, MA, USA

<sup>6</sup> Mannheim Institute of Public Health, Social & Preventive Medicine, University of Heidelberg, Germany

<sup>7</sup> BGStats Consulting, Vienna, Austria

<sup>8</sup> Clinical Institute of Medical and Chemical Laboratory Diagnostics, Medical University of Graz, Graz, Austria

<sup>9</sup> Department of Internal Medicine V, University of Heidelberg-Mannheim, Mannheim, Germany,

<sup>10</sup> Synlab Center of Laboratory Diagnostics, Heidelberg, Germany
